1                   **Multiomic prioritisation of risk genes for anorexia nervosa**

2  
3   Danielle M. Adams<sup>1,2</sup>, William R. Reay<sup>1,2</sup>, Murray J. Cairns<sup>1,2</sup>

4  
5   <sup>1</sup>Centre for Complex Disease Neurobiology and Precision Medicine, School of Biomedical  
6   Sciences and Pharmacy, The University of Newcastle, Callaghan, NSW, Australia

7   <sup>2</sup>Precision Medicine Research Program, Hunter Medical Research Institute, Newcastle, NSW,  
8   Australia

9  
10   To whom correspondence should be addressed: Professor Murray Cairns  
11   ([Murray.Cairns@newcastle.edu.au](mailto:Murray.Cairns@newcastle.edu.au))

12  
13  
14  
15  
16  
17  
18  
19  
20  
21  
22  
23  
24  
25  
26  
27  
28  
29  
30  
31  
32  
33  
34  
35

36 **ABSTRACT**

37 Anorexia nervosa is the leading cause of mortality among psychiatric disorders worldwide. Currently  
38 no medications are approved for anorexia nervosa treatment, and thus, identification of risk factors  
39 for this disorder is pivotal to improve patient outcomes. We used models of genetically imputed  
40 expression and splicing from 17 tissues (two blood and fifteen brain regions), leveraging mRNA,  
41 protein, and mRNA alternative splicing weights to identify genes, proteins, and transcripts,  
42 respectively, associated with anorexia nervosa risk. We uncovered 134 genes for which genetically  
43 predicted mRNA expression was associated with anorexia nervosa after multiple-testing correction,  
44 as well as four proteins and 16 alternatively spliced transcripts. Conditional analysis of these  
45 significantly associated genes on other proximal association signals resulted in 97 genes  
46 independently associated with anorexia nervosa. Moreover, probabilistic finemapping further refined  
47 these associations and prioritised putative causal genes. The gene *WDR6*, for which increased  
48 genetically predicted mRNA expression was correlated with anorexia, was strongly supported by both  
49 conditional analyses and finemapping. Pathway analysis of genes revealed by finemapping identified  
50 regulation of *immune system process* (overlapping genes = *MST1*, *TREX1*, *PRKAR2A*, *PROS1*) as  
51 statistically overrepresented. In summary, we leveraged multiomic datasets to genetically prioritise  
52 novel risk genes for anorexia nervosa that warrant further exploration.

53

54 **INTRODUCTION**

55 Anorexia nervosa is a complex psychiatric disorder associated with alterations to satiety, activity, and  
56 self-perception that results in severe mental distress and malnourishment (1). Anorexia nervosa  
57 usually begins during adolescence with a long course of illness and one of the highest mortality rates  
58 of any psychiatric disorder (2). Cognitive behavioural therapy and weight rehabilitation are the first-  
59 line treatments for anorexia nervosa, as there are still no approved pharmacotherapies for the disorder  
60 (3). Unravelling the biological complexity of anorexia onset and its clinical course will be key to  
61 developing more effective interventions and improving clinical management.

62

63 Anorexia is a complex disorder influenced by genetic and environmental factors, with twin studies  
64 estimating heritability at 56% (4), and common variants are now shown to account for around 20%  
65 of this through genome-wide association studies (GWAS) (5). The most recent anorexia nervosa  
66 GWAS uncovered eight independent genome-wide associated loci (6). While this presents an  
67 opportunity to identify new drug targets, many of the causal variants in these loci will be confounded  
68 by linkage disequilibrium (LD) and other interactions that obscure their effects on specific genes.

69

70 Gene-based aggregation methods can increase power to detect associations beyond genome-wide  
71 significant loci and yield more biologically relevant information. For example, transcriptome wide  
72 association studies (TWAS) achieve this by integrating mRNA expression data with GWAS  
73 association data to detect genes for which genetically predicted expression is associated with the trait  
74 (7). This approach can be extended to other quantitative functional data such as protein and  
75 alternatively spliced mRNA isoform abundance. TWAS is capable of prioritising genes that may be  
76 involved in the disorder and also assign them a direction of expression that is odds increasing. (7).  
77 Despite these useful features TWAS alone is not a test of causality as the signal does not exclude the  
78 possibility of co-regulation between genes or LD between variants used in expression models (8).  
79 Interrogating TWAS results through approaches such as conditional analysis and probabilistic  
80 finemapping can be utilised to overcome some of these limitations and identify genes from  
81 association signals that could constitute a causal relationship (9, 10).

82

83 Anorexia TWAS data have previously been leveraged to reveal insights into the pathogenesis of the  
84 disorder (11-13), however, these studies did not specifically prioritise genes that could be involved  
85 in the disorder. In addition, extending TWAS to the use of protein and mRNA isoform weights has  
86 not previously been investigated for anorexia nervosa and could further identify novel risk genes. In  
87 this study, we utilise models of genetically predicted mRNA expression, protein expression, and  
88 alternative mRNA isoform abundance to prioritise genes involved in anorexia nervosa. These  
89 associations signals were further refined through conditional analysis and finemapping to reveal  
90 several genes including WDR6 with plausible utility as targets for therapeutic intervention. Pathways  
91 analysis also implicated regulation of *immune system process* with gene set functional analysis  
92 including signal from *MST1*, *TREX1*, *PRKAR2A* and *PROS1*.

93

## 94 **METHODS**

### 95 **Overview of study**

96 We aimed to prioritise genes associated with anorexia nervosa and implicate potential mechanisms  
97 related to expression and/or splicing. Firstly, we conducted a comprehensive brain and blood-based  
98 transcriptome-wide association study (TWAS) (8, 14, 15). TWAS requires expression data which can  
99 be imputed from independent SNP-mRNA expression weights from multivariate models of *cis*-acting  
100 genetically regulated expression (GR<sub>E</sub>X). TWAS then compares imputed expression with SNP-  
101 anorexia effect sizes to test the association between predicted expression and the odds of anorexia.  
102 Genes uncovered from this approach that survived multiple-testing correction were then further  
103 probed to refine candidate causal genes through conditional analysis and probabilistic fine-mapping  
104 (10, 14). Whilst mRNA expression is arguably the most well studied cellular readout, genes may

105 operate more specifically in the pathogenesis of anorexia nervosa through dysregulation of other  
106 factors like protein expression and alternative splicing. As a result, we leveraged SNP weights, where  
107 available, for protein expression and splicing to also perform a proteome-wide association study  
108 (PWAS) and an alternative splicing based test (spliceWAS). Genes were prioritised based on  
109 evidence from mRNA, protein, and alternative isoform expression and then subjected to further *in*  
110 *silico* analyses related to overrepresentation in biological pathways, spatiotemporal expression, and  
111 *in vivo* phenotypes. The anorexia nervosa GWAS utilised in this study was a meta-analysis European  
112 ancestry cohort that totalled 16,992 cases and 55,525 controls – further details related to collection of  
113 samples, phenotype acquisition, and GWAS approach are described in the original publication (6).

114

### 115 **Weights for genetically predicted mRNA, protein, and splicing**

116 Brain related SNP weights (multivariate GReX) for TWAS were derived from GTEx v7 and  
117 PsychENCODE, whilst whole blood weights were also obtained from GTEx v7 (14, 16). The GTEx  
118 v7 SNP weights comprise data from twelve different brain regions – with the sample sizes of the  
119 cohorts utilised for GReX estimation as follows: amygdala (N=88), anterior cingulate cortex  
120 (N=109), caudate (N=144), cerebellar hemisphere (N=125), cerebellum (N=154), cortex (N=136),  
121 frontal cortex (N=136), hippocampus (N=111), hypothalamus (N=108), nucleus accumbens (N=130),  
122 putamen (N=80) and substantia nigra (N=80). HapMap3 SNPs from the 1000 genomes phase 3  
123 European reference panel were used as a linkage disequilibrium (LD) estimate, to correspond with  
124 how the weights were calculated with those same HapMap3 SNPs. The TWAS using whole blood  
125 weights utilised the same LD reference strategy, with 369 GTEx v7 participants in these models.  
126 Frontal or cerebral cortex tissue from the larger PsychENCODE cohort was also utilised in terms of  
127 SNP weights, with a sample size of 1695. As described in the original PsychENCODE publication,  
128 gene-wise GReX were estimated for all imputed SNPs, not just the HapMap3 panel, and thus, we  
129 utilised the full suite of the phase 3 1000 genomes European subset as the LD reference. There were  
130 two tissues for which SNP weights related to protein expression were available – the dorsolateral  
131 prefrontal cortex (DLPFC, N = 376) and plasma (N = 7213) (17, 18). It should be noted that the  
132 plasma weights were derived from the European subset of the study cohort and the authors only used  
133 the elastic net method to derive GReX. Analogous to the difference between the GTEx v7 and  
134 PsychENCODE studies above, the DLPFC SNP weights were estimated using the HapMap3 panel,  
135 and thus, we only used those SNPs as an LD reference. The plasma PWAS utilised the full reference  
136 panel. Finally, the splicing related weights were derived from the DLPFC samples from the Common  
137 Mind Consortium (N=452) which utilised the HapMap3 restricted 1000 genomes panel (19).

138

139

## 140 **Implementation of the FUSION pipeline**

141 We conducted TWAS/PWAS/spliceWAS using the FUSION package (14). Specifically, the  
142 *FUSION.assoc\_test.R* script was utilised, with the best performing GReX model selected from five-  
143 fold cross-validation ( $R^2$ ) and the SNP weight set selected by FUSION for calculating the TWAS  $Z$   
144 score. In accordance with usual practice for the FUSION approach, only genes/transcripts with  
145 significantly non-zero *cis*-acting heritability ( $cis-h^2$ ) are included. Prior to analysis, summary  
146 statistics were also munged whereby SNPs were retained with an imputation INFO > 0.9, as well as  
147 removing indels, strand ambiguous SNPs and SNPs with MAF < 0.01. We corrected for the number  
148 of non-missing SNP weight sets using the Bonferroni [family-wise error rate (FWER) based] and  
149 Benjamini-Hochberg [false discovery rate (FDR) based] approaches for the TWAS, PWAS, and  
150 spliceWAS independently.

151

## 152 **Conditional analyses and probabilistic fine-mapping**

153 We applied conditional analysis via the FUSION framework (*FUSION.post\_process.R*) to the regions  
154 of significant genes after correction to investigate the proportion of implicated genes in any given  
155 locus that are independently associated. Specifically, jointly significant genes retain their significance  
156 after jointly estimating association for all models within a 500,000 base pair region of a significant  
157 gene. Marginally associated genes, which are not jointly significant, likely arise due to factors such  
158 as genes for which predicted expression was correlated.

159

160 Moreover, we applied probabilistic finemapping to prioritise candidate causal genes from any locus  
161 in the anorexia GWAS summary statistics with at least a suggestively significant SNP ( $P < 1 \times 10^{-5}$ )  
162 using the FOCUS method (10). The default prior ( $p = 1 \times 10^{-3}$ ) and prior variance ( $n\sigma^2 = 40$ ) were  
163 utilised to approximate Bayes' factors such that the posterior inclusion probability (*PIP*) of each gene  
164 being a member of a credible set with 90% probability of containing the causal gene could be derived.  
165 Finemapping was performed with default tissue prioritisation in addition to the prioritisation of brain  
166 tissue. In the TWAS, there were two reference panels utilised for fine-mapping – for genes uncovered  
167 from a GTEx v7 tissue, we utilised the default combined FOCUS SNP weight set which collated  
168 GTEx v7 tissues, DLPFC (CommonMind), blood (YFS, NTR), and adipose (METSIM) SNP weight  
169 sets (<https://www.dropbox.com/s/ep3dzlqnp7p8e5j/focus.db?dl=0>), with genes discovered using the  
170 PsychENCODE weights fine-mapped specifically using that panel given the different LD parameters  
171 and its more complete set of genes with *cis*-heritable models in that one tissue. The multi-tissue fine-  
172 mapping panel contains several other non-brain tissues, and thus, some GReX models that would not  
173 have been available in brain and blood. We sought to balance maximising the number of models  
174 available for finemapping, whilst acknowledging that some of the tissues in this panel are less likely

175 to be disease relevant. As FOCUS allows the null mode that the causal feature is not typed to be  
176 predicted as a possible member of the credible set, we excluded any genes for which that occurred.  
177 The credible set was defined by summing normalised *PIP* such that  $\rho$  was exceeded, sorting the genes,  
178 and then including those genes until at least  $\rho$  of the normalised-posterior mass is explained, as  
179 described in more detail elsewhere (10, 20). As an exploratory analysis, we also applied finemapping  
180 to the PWAS and spliceWAS results, although the limited number of SNP weights available for  
181 protein and alternative splicing means that the probability of a causal gene for any region not being  
182 present is higher.

183

#### 184 **Investigation of prioritised anorexia nervosa associated genes**

185 We further investigated two sets of prioritised genes *in silico*: 1) conditionally independent  
186 associations (TWAS/PWAS/spliceWAS) from marginally significant signals (FDR < 0.05) that are  
187 at least nominally jointly significant ( $P < 0.05$ ), and 2) genes in the fine-mapped 90% credible set  
188 with  $PIP > 0.4$  and the absence of the null model in the credible set. Firstly, we considered biological  
189 pathways and other ontological sets for which these two sets of genes could separately be  
190 overrepresented via the g:Profiler framework and the Benjamini-Hochberg method for multiple-  
191 testing correction (21). Moreover, the GENE2FUNC module of FUMA (functional mapping and  
192 annotation of genetic associations) was utilised to test for tissue specific expression amongst different  
193 tissues (GTEx v8: 54 tissue types) and temporal stages of brain development (BrainSpan: 29 different  
194 ages of brain samples) (22). Interactions between proteins may indicate shared mechanisms of action,  
195 and thus, protein-protein interactions for these gene-sets were estimated using STRING (23). Protein-  
196 protein interactions were obtained from experiment and database sources (interaction score > 0.7)  
197 using a 5% false discovery rate. STRING estimates the interactions between proteins within a set, in  
198 addition to quantifying if the observed number of interactions is greater than expected given the size  
199 of the gene-set.

200

#### 201 **RESULTS:**

##### 202 **Novel anorexia risk genes uncovered through genetically predicted expression or splicing**

203 Firstly, a transcriptome-wide association study was performed using models of genetically predicted  
204 mRNA expression across twelve brain regions from GTEx, cortical samples from the PsychENCODE  
205 consortium, and whole blood GTEx samples. This was the most well-powered approach as there were  
206 57,596 mRNA models available to test, with the number of unique genes totalling 11,242, 12,183,  
207 and 5,915, for GTEx brain, PsychENCODE brain, and GTEx whole blood samples, respectively  
208 (*Supplementary Table 1*). The most significant association signals were found in a gene dense region  
209 on chromosome 3 (*Figure 1*), in line with expectation given the significant GWAS signal for anorexia

210 nervosa (chromosome 3: 47,588,253- 51,368,253) overlaps this cluster of significant genes.  
211 Upregulation of the gene encoding WD Repeat Domain 6 (*WDR6*) was the top hit in this region  
212 associated with increased odds of anorexia nervosa –  $Z_{TWAS} = 7.44$ ,  $P = 9.96 \times 10^{-14}$  (GTEx cortex).  
213 This gene also surpassed Bonferroni correction in several other tissues, including the larger sample  
214 size PsychENCODE cortical samples, whole blood, nucleus accumbens, and caudate basal ganglia.  
215 The WD repeat protein family effects signal transduction (24), whilst *WDR6* is thought to influence  
216 cell cycle arrest (25). Several other proximal genes to *WDR6* also survived Bonferroni correction in  
217 multiple tissues, such as, *CCDC71*, *NCKIPSD*, and *MST1R*. *O*-6-Methylguanine-DNA  
218 Methyltransferase (*MGMT*) was the most significant gene outside of chromosome 3 ( $Z_{TWAS} = -5.33$ ,  
219  $P = 9.88 \times 10^{-8}$  – caudate basal ganglia), followed by *CDK11B* on chromosome 1 and the long non-  
220 coding RNA (lncRNA) *LINC00324* on chromosome 17. Previous analysis, differing in methodology  
221 and samples found an association between *SUOX* expression and anorexia which was not replicated  
222 in the present study (12, 26).

223

224 We then sought to extend the power for gene discovery, as well as supporting signals uncovered by  
225 the TWAS, through integration of models of genetically regulated protein expression (PWAS) and  
226 alternative splicing (spliceWAS, *Supplementary Tables 2, 3*). There were 2,300 protein expression  
227 SNP weight sets in total available to test across the DLPFC and blood cohorts in which the imputed  
228 expression models were trained. Two proteins survived Bonferroni correction in the PWAS, and we  
229 uncovered four signals that were significant after applying a less stringent FDR based cut-off (FDR  
230  $< 0.05$ ). The strongest protein association, MHC class I chain-related gene B (*MICB*) ( $Z_{PWAS} = 4.53$ ,  
231  $P = 5.75 \times 10^{-6}$ , plasma) was correlated with increased odds risk of anorexia, however, due to the  
232 extensive LD of the MHC region it is difficult to apply approaches such as PWAS, and thus, this  
233 signal should be treated cautiously. The densely associated region on chromosome 3 harboured the  
234 next most significant protein expression signal, with decreased predicted expression of Glutathione  
235 peroxidase 1 (*GPX1*) associated with anorexia in the DLPFC ( $Z_{PWAS} = -4.41$ ), mirroring its negative  
236 TWAS test statistic in the hypothalamus for mRNA expression ( $Z_{TWAS} = -4.51$ ). Thereafter, the  
237 remaining two proteins surviving correction were each on different chromosomes (*FGF23*, chr 12  
238 and *CTNND1*, chr 11). The spliceWAS yielded fourteen transcripts that survived Bonferroni  
239 correction from the 7,708 transcripts tested relating to 3,291 total genes. The mean number of  
240 alternatively spliced transcripts per gene that were significantly *cis*-heritable and available for  
241 analyses was 2.3. Once more the anorexia nervosa association dense region on chromosome 3  
242 implicated already by GWAS, TWAS, and PWAS, yielded the most significant signal, with seven  
243 transcripts of *ARIH2* significantly associated. Interestingly, there were mixed directions of effect  
244 amongst the different isoforms as increased predicted abundance of three splice variants were

245 associated with anorexia, whilst the converse was true for the remaining four. None of these isoforms  
246 correspond to the canonical transcript; chr3:48918821:48967151 (27). In general, the *ARIH2* gene is  
247 postulated to regulate ubiquitination (28, 29) and post-transcriptionally modifies *NLRP3* to reduce  
248 inflammatory activity (30), however, the functional specificity of particular splicing isoforms is less  
249 well characterised. This gene was also not significant in the TWAS, despite having a well-powered  
250 model of imputed expression in the PsychENCODE cortical samples. The only remaining transcripts  
251 surviving Bonferroni correction not proximally located to the chromosome 3 region were two  
252 isoforms of GPR75-ASB3 Readthrough (*GPR75-ASB3*), which are isoforms from which a naturally  
253 occurring readthrough occurs between two genes (*GPR75* and *ASB3*), and thus, features exons from  
254 both genes. Decreased predicted abundance of these two isoforms was associated with anorexia.

255

256 We then intersected the TWAS, PWAS, and spliceWAS results, finding that of the genes modelled,  
257 or a transcript thereof, 631 were available with a significantly *cis*-heritable model for all three  
258 modalities (mRNA, protein, alternative splicing), no genes significantly (Benjamini-Hochberg)  
259 overlapped all three methods. From the 134 Benjamini-Hochberg significant TWAS genes, four of  
260 these were nominally significant ( $P < 0.05$ ) for protein expression, while 13 were nominally  
261 significant for isoform expression. Two of the Four Benjamini-Hochberg significant PWAS genes  
262 were nominally significant for TWAS without any isoform overlap. Of the 16 Benjamini-Hochberg  
263 significantly associated gene isoforms from the spliceWAS, 12 had nominally significant mRNA  
264 expression models, while only one had a nominally significant protein expression model. The *Z* scores  
265 from models with available data across all three modalities exhibited low correlation (mRNA-protein:  
266  $r = 0.07$  [ $P=1.3 \times 10^{-11}$ ], protein-isoform:  $r = -0.008$  [ $P=0.49$ ], mRNA-isoform:  $r = 0.02$  [ $P=0.04$ ]),  
267 however, the correlation between mRNA and protein expression was statistically significant.

268

269



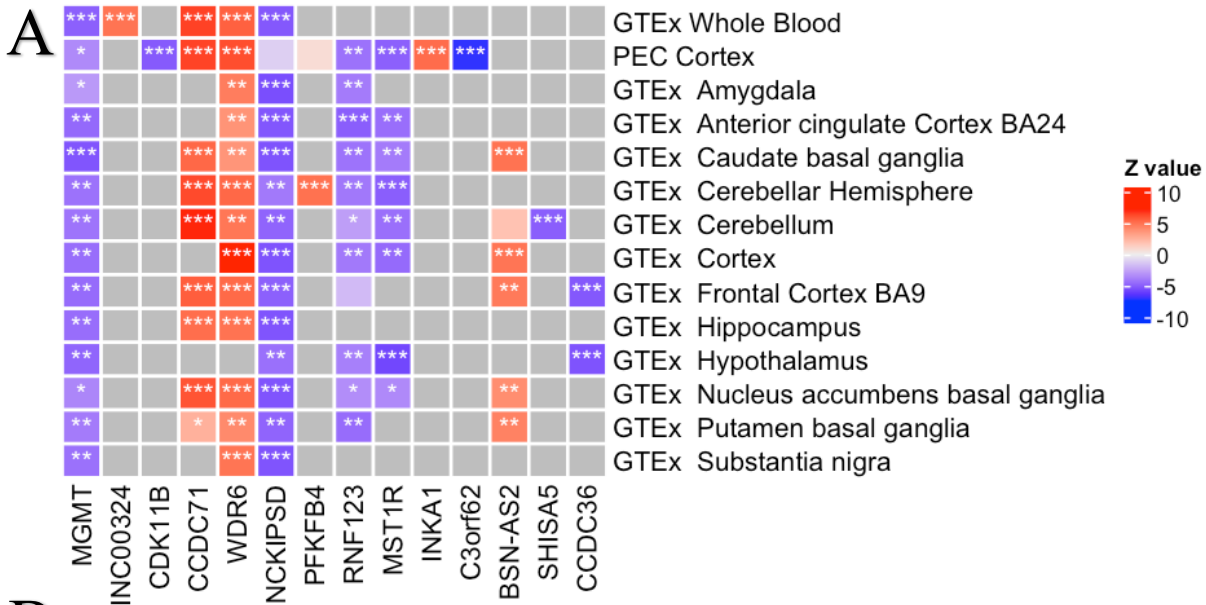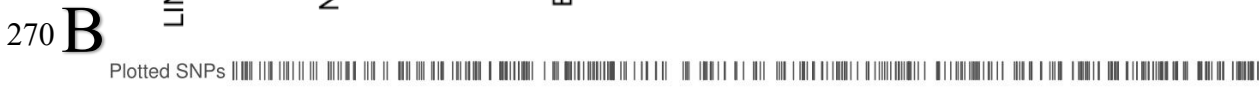

271  
 272 **Figure 1: TWAS associations and region plot of the densely associated anorexia signal on chromosome 3.** A: Heatmap of genes with  
 273 at least one Bonferroni significant eQTL tissue associated with anorexia nervosa. Red indicates positive z scores, blue indicates  
 274 negative z scores (legend). Columns indicates genes, rows indicate tissue models. \* Indicates nominally significant genes, \*\* indicates  
 275 Benjamini-Hochberg significant association, \*\*\* indicates Bonferroni significant association. Grey squares indicate that a  
 276 significantly cis-heritable model of imputed expression data was unavailable in that tissue. B: Relative anorexia nervosa gene and  
 277 SNP locations and significance. Points in the top panel indicate SNPs, legend indicates  $r^2$ , left side y-axis indicates the negative log  
 278 transformed p-value of SNPs, right side y-axis indicates the recombination rate (cM/Mb). The bottom panel indicates the location of  
 279 genes relative to the top panel SNPs. Plot generated using ZoomLocus (31) with 200kb flanking size. The SNP with the most significant  
 280 p-value in this region: rs73082362 is highlighted.

281  
 282  
 283

284 **Conditional analyses and probabilistic fine-mapping further refine anorexia association signals**  
285 Co-regulation and LD between genes can confound TWAS signals and lead to spurious associations  
286 for non-causal genes. Conditional analysis and finemapping was performed to distinguish genes with  
287 increased evidence of exerting an independent causal effect on anorexia nervosa. Conditional analysis  
288 (14) estimates the residual independent association of TWAS signals after controlling for the  
289 predicted expression of nearby significant genes. Benjamini-Hochberg significant TWAS genes were  
290 subjected to conditional analysis to predict which genes accounted for the localised signal. From 313  
291 significant TWAS signals, 97 genes had a conditionally independent association ( $P_{\text{Joint}} < 0.05$ ) with  
292 anorexia nervosa as indicated by their nominally significant joint  $P$  value (*Supplementary table 4*).  
293 The gene most significantly associated with anorexia, *WDR6* ( $Z_{\text{conditional-TWAS}}=7.4$ ,  $P=1 \times 10^{-13}$ , Cortex)  
294 maintains an independent association after conditioning on the 77 other TWAS significant gene  
295 models (21 genes) from chromosome 3, three of which are also conditionally independent (*CTNNB1*,  
296 *GOLIM4*, *STX19*).  
297  
298 Finemapping (10) is a Bayesian statistical method designed to isolate subsets of genes more likely to  
299 contain causal genes. We applied this approach to all suggestively significant regions in the anorexia  
300 GWAS ( $P_{\text{GWAS}} < 1 \times 10^{-5}$ ) to derive 90% credible sets. Credible sets were removed if they contained  
301 the null model that is included by FOCUS to account for missing causal mechanisms like genes  
302 without a suitable GReX model. Across either mRNA, protein or mRNA alternative splicing weights  
303 there were 116 genes that were prioritised in a credible set (*Supplementary table 5*). Of these eight  
304 genes (*Table 1*) had moderate ( $PIP > 0.4$ ) evidence of a causal effect on anorexia, while five genes  
305 demonstrated strong evidence ( $PIP > 0.8$ ). The strongest evidence of a causal relationship was  
306 observed for Neurexophilin And PC-Esterase Domain Family Member 1 (*NXPE1*) ( $PIP=1$ , testis).  
307 Surprisingly, *NXPE1* was indicated for the testis (GTEx), whilst it was also highly expressed in the  
308 colon (32). The other four genes with strong evidence of a potential causal effect on anorexia were  
309 as follows: *WDR6* ( $PIP=0.997$ , DLPCF), *PRKAR2A* ( $PIP=0.814$ , GTEx artery tibial), *PROS1* ( $PIP=$   
310  $0.895$ , GTEx cortex) and the non-coding RNA *RP13-238F13.5* ( $PIP=0.971$ , GTEx spinal cord  
311 cervical c-1). *WDR6* and *MST1* were the only genes found to be both conditionally independent with  
312 at least moderate finemap evidence of a causal relationship (*Table 1*). Macrophage Stimulating 1  
313 (*MST1*) mediates cell division and apoptosis (33, 34) and is predicted to increase risk of anorexia  
314 ( $Z_{\text{TWAS}} = 4.85$ ,  $P=1.2 \times 10^{-6}$ , GTEx Hypothalamus). However, finemapping of the *MST1* PWAS  
315 indicates evidence of a protective relationship with anorexia ( $Z_{\text{finemap}} = -4.63$ ,  $PIP=0.457$ , blood  
316 plasma protein). This discordant direction between mRNA and protein requires further investigation  
317 to refine its biological salience. The power of finemapping to identify causal genes increases when  
318 more GReX expression models are included, and thus, tissues were used for finemapping that were

319 not subjected to the marginal TWAS, since removing these would decrease finemapping power.  
 320 There are three genes (*RP13-28F13.5*, *NXPE1* and *PRKAR2A*) without TWAS blood and brain  
 321 associations. One of these; *PRKAR2A* exists in a credible set with four other genes (the same set as  
 322 the fine-mapped *TREX1*), three of which are associated within brain regions. The DGIdb drug bank  
 323 was queried to determine if any FDA approved pharmaceutical interventions exist which target these  
 324 anorexia nervosa associated genes. The DGIdb drug bank indicated six drugs which target *PROSI*  
 325 (35) a fine-mapped gene for which increased genetically predicted expression was associated with  
 326 increased anorexia nervosa risk. One of these drugs, menadione is indicated to activate *PROSI* (36,  
 327 37), however, as a risk increasing gene it would need to be inhibited to potentially treat anorexia  
 328 nervosa. There are currently no approved drugs for the other fine-mapped genes (*MST1*, *WDR6*,  
 329 *RP13-238F13.5*, *NXPE1*, *C3orf62*, *TREX1* and *PRKAR2A*) which could be an avenue for future  
 330 research.

331  
 332 **Table 1: Finemap associations.** Finemapped genes with moderate or strong evidence of a causal effect on anorexia ( $PIP > 0.4$ ). Tissue  
 333 indicates which tissue the expression weights were derived from, Ref name indicates the group/consortium responsible for eQTL  
 334 generation,  $Z_{finemap}$  indicates the estimated Z score association, PIP indicates the posterior inclusion probability and region indicates  
 335 the GRCh37 genomic region the credible set was derived from. Credible set size indicates the number of genes in the credible set when  
 336 prioritising brain or any tissue. All genes are in the credible set.  $Z_{TWAS}(P)$  -tissue and  $Z_{PWAS}(P)$  -tissue indicates the TWAS and PWAS  
 337 Z score and P value associated with the most significant tissue for each association. No spliceWAS associations are available for these  
 338 eight genes.

| Molecular name       | tissue                               | Ref name | $Z_{finemap}$ | PIP   | $Z_{TWAS}(P)$ -tissue                                                  | $Z_{PWAS}(P)$ -tissue                      | region                    | Credible set size (brain/default) |
|----------------------|--------------------------------------|----------|---------------|-------|------------------------------------------------------------------------|--------------------------------------------|---------------------------|-----------------------------------|
| <i>MST1</i>          | Blood plasma protein                 | gtex     | -4.63         | 0.457 | 4.85 ( $1.2 \times 10^{-6}$ )-hypothalamus - Conditionally independent | -3.4787 ( $5.04 \times 10^{-4}$ ) - plasma | 3:49317941-3:51830833     | NA/1                              |
| <i>WDR6</i>          | brain dorsolateral prefrontal cortex | pec      | 6.46          | 0.997 | 7.44 ( $9.96 \times 10^{-14}$ )-cortex - Conditionally independent     | NA                                         | 3:49317338-3:51828635     | 1/1                               |
| <i>RP13-238F13.5</i> | brain spinal cord cervical c-1       | gtex     | 5.01          | 0.97  | NA                                                                     | NA                                         | 10:125919795-10:127999424 | 1/1                               |
| <i>NXPE1</i>         | testis                               | gtex     | 6.02          | 1     | NA                                                                     | NA                                         | 11:114833710-11:116383064 | 1/1                               |
| <i>C3orf62</i>       | brain dorsolateral prefrontal cortex | cmc      | -7.19         | 0.423 | -7.13 ( $9.71 \times 10^{-13}$ )-cortex                                | NA                                         | 3:47777774-3:49313978     | 4/384                             |
| <i>TREX1</i>         | brain cortex                         | gtex     | -6.95         | 0.449 | -3.2575 ( $1.1 \times 10^{-3}$ ) - Nucleus accumbens basal ganglia     | -2.1349 (0.032) - DLPFC                    | 3:49317338-3:51815687     | 5/476                             |
| <i>PROSI</i>         | brain cortex                         | gtex     | 5.21          | 0.895 | 0.07 (0.94) -whole blood                                               | NA                                         | 3:94256654-3:95306175     | 2/3                               |
| <i>PRKAR2A</i>       | artery tibial                        | gtex     | -6.95         | 0.814 | NA                                                                     | NA                                         | 3:49317338-3:51815687     | 5/476                             |

339  
 340

341 **Functional interrogation of prioritised anorexia nervosa risk genes suggests a role for immune**  
342 **function**

343 Pathway analysis was performed on the conditionally independent (N = 97) and fine-mapped credible  
344 set (N = 8) genes using g:Profiler (Ensembl 103, Ensembl Genomes 50). We focused on pathways  
345 that were enriched for either of these input sets of genes that survived FDR correction (FDR < 0.05)  
346 and had at least three intersecting genes with the input list. Firstly, the conditionally independent  
347 genes were overrepresented amongst pathways related to the *presynaptic active zone* (overlapping  
348 genes = *STX19, CTNND1, CTBP2, CTNNA1*) (Supplementary Table 6). While the genes prioritised  
349 by fine-mapping were overrepresented in the *regulation of immune system process* (overlapping  
350 genes = *MST1, TREX1, PRKAR2A, PROS1*) (Supplementary Table 7).

351  
352 To determine the potential functional mechanisms through which finemapped and conditionally  
353 independent genes may affect anorexia nervosa, we investigated tissue specificity, temporal  
354 expression and protein interactions. Both the predicted conditionally independent genes and the  
355 finemapped credible genes with moderate evidence of a causal effect on anorexia were investigated  
356 with STRING and FUMA (Supplementary figure 1-4). STRING (Supplementary figure 5, 6)  
357 indicated that fewer protein-protein interactions occur within the set of finemapped genes (STRING-  
358  $P=1$ ) and conditionally independent genes (STRING- $P=0.4$ ) than expected. This may indicate that  
359 there are no biological mechanism linking the finemapped genes, however these results may also be  
360 explained by incomplete availability of data. Considering anorexia nervosa onset predominately  
361 occurs during adolescence it would be expected that genes that impact anorexia aetiology may be  
362 differentially expressed during this period, however FUMA GENE2FUNC did not indicate any  
363 consistent increased or decreased differential expression during adolescence. Similarly, there was no  
364 systemic patterns of tissue expression across these sets of genes, however it is not a prerequisite for  
365 genes to exhibit differential expression in the regions with which they exert an effect. These methods  
366 are limited by the accuracy and depth of gene functional data which may prevent the analysis of  
367 pathways or genes that are poorly characterised.

368  
369 **DISCUSSION**

370 Anorexia nervosa is a complex disorder characterised by weight loss, altered self-perception and other  
371 comorbidities such as anxiety. To advance new treatments we need to increase our understanding of  
372 the pathogenic mechanisms that underlie the onset and progression of the disorder, as cognitive  
373 behavioural therapy is the only approved treatment (3). In the current study we integrated genome  
374 wide association signal for anorexia nervosa with genetically regulated gene expression to identify  
375 potential drugs targets for the disorder.

376

377 Triangulation of evidence across statistical association methods enhances the confidence in the  
378 disorder relevance of a gene. Upregulation of WD Repeat Domain 6 (*WDR6*) was supported in our  
379 study as exhibiting a plausible causal relationship with anorexia nervosa across all methods with  
380 available data (TWAS, conditional analysis, fine-mapping). The region surrounding *WDR6* is dense  
381 with genes also predicted to have an association with anorexia nervosa but due to linkage  
382 disequilibrium, refining causal genes is challenging. A conditionally significant TWAS signal along  
383 with the finemapping evidence suggests that *WDR6* is a causal gene at this locus, however, further  
384 analyses such as SNP based finemapping and *in silico* prediction of variants in this locus are  
385 warranted in future to confirm this finding given genetic influence on disease may not directly be  
386 mediated by *cis*-acting expression. *WDR6* is a conserved repeat region expression ubiquitously during  
387 human development that may function as a restriction factor to inhibit virus replication and a protein  
388 complex assembly platform (38-40). In rats *WDR6* physically interacts with insulin receptor substrate  
389 4 to modulate insulin signalling in the hypothalamic arcuate nucleus (41). Both *WDR6* (42) and  
390 circulating insulin (43) inhibit autophagy. While incidence of apoptosis and autophagy particularly  
391 in the liver are increased in anorexia patients (44, 45). Additionally, fasting insulin level has evidence  
392 to suggest it exerts a protective effect against anorexia nervosa risk (46) which may relate to the  
393 predicted effect of *WDR6* on anorexia nervosa.

394

395 Accumulating observational evidence suggests a relationship may exist between immune function  
396 and anorexia nervosa (47, 48). Starvation can lead to inflammation; however, there remains  
397 differences between the presentation of immune dysregulation during malnutrition and anorexia  
398 nervosa, suggesting an underlying relationship may exist beyond the pathology associated with  
399 malnutrition (49). Interestingly, four of the eight fine-mapped genes including *MST1*, *TREX1*,  
400 *PRKAR2A*, and *PROS1* were a member in the *immune system processes* gene-set, which was a  
401 statistically significant overrepresentation. This is supportive of previous observations suggesting that  
402 immune system dysregulation may contribute to anorexia nervosa onset and maintenance (49).  
403 Furthermore, the strongest protein PWAS signal MICB, which implicates the MHC region, and the  
404 lead mRNA isoform gene *ARIH2* were also present within the immune system processes pathway.  
405 However, the overrepresentation in this instance was not significant like the finemapped genes. The  
406 identification of an MHC protein (MICB) in the PWAS necessitates further analysis of the MHC  
407 region in anorexia nervosa, such as the role of specific human leukocyte antigen (HLA) types.  
408 Conditionally independent or finemapped genes from this pathway; *MST1* (50, 51), *PRKAR2A* (52)  
409 and *ARIH2* (30) have been linked to inflammatory processes in previous studies. Anorexia nervosa  
410 is observationally associated with a pro-inflammatory state which includes increased levels of

411 cytokines such as tumour necrosis factor and interleukins 1 and 6, in addition to T cell proliferation  
412 (49, 53, 54). Although these studies are likely confounded by factors like reverse causality that  
413 complicates their interpretation. Recent genetic evidence from our group demonstrates evidence of a  
414 protective effect of C-reactive protein (CRP) on anorexia nervosa, which may relate to infection  
415 susceptibility given that CRP is not simply a marker of inflammation, as is often characterised, and  
416 directly participates in processes like phagocytosis (48, 55). Our data suggests that genes with  
417 immune related functions are involved in the pathogenesis of anorexia nervosa. Further work is now  
418 needed to refine whether the immune system is a plausible target for anorexia nervosa that could lead  
419 to new treatments-

420

421 Whilst TWAS, SpliceWAS and PWAS provide a mechanistic framework for the associative evidence  
422 between genes and disease, there is also significant confounding by co-regulation derived correlation.  
423 TWAS associations can also be confounded by linkage disequilibrium which can bias SNP effect  
424 estimates for both expression weights and disease associations (7). The performance of TWAS is also  
425 limited to some extent by the sample size of GReX data from different tissues and that some genes  
426 are not expressed and are therefore “missing” from a relevant gene set. Incompleteness of gene  
427 expression data diminishes the effectiveness of finemapping, null models within the credible set could  
428 be better linked to potentially causal genes which would allow for the identification of other causal  
429 genes. Analyses performed in exclusively European ancestries will not have the benefit of variant  
430 diversity than can support the finemapping and when larger and more diverse non-European samples  
431 and trans-ancestry GWAS become available, this is likely to improve TWAS and fine mapping  
432 studies. Another limitation in the existing anorexia nervosa GWAS has been the predominately  
433 female composition which restricts the identification of sex specific causal risk/protective factors.  
434 Increased male case acquisition and diagnosis for future GWAS is therefore likely to improve risk  
435 characterisation across demographics.

436

437 In conclusion, our study highlighted novel genes, proteins and mRNA isoforms predicted to effect  
438 anorexia risk. In particular, we provide strong evidence suggesting that *WDR6* and several genes  
439 related to immune system function contribute to the pathogenesis of the disorder. Further research is  
440 warranted to establish these mechanisms and determine their potential as targets for treatment.

441

#### 442 **DATA AVAILABILITY**

443 All data in this study are publicly available. GWAS summary statistics for anorexia nervosa are  
444 available to download from the Psychiatric Genomics Consortium  
445 (<https://www.med.unc.edu/pgc/download-results/>). The TWAS and spliceWAS SNP weights are

446 available from (<http://gusevlab.org/projects/fusion/>), whilst the PWAS SNP weights can be  
447 obtained from (<http://nilanjanchatterjeelab.org/pwas/>) and  
448 (<https://www.synapse.org/#!Synapse:syn23627957>) for plasma and brain, respectively.

449

#### 450 **ACKNOWLEDGEMENTS**

451 This work was supported by a National Health and Medical Research Council (NHMRC) grant  
452 (1188493). M.J.C. is supported by an NHMRC Senior Research Fellowship (1121474). The funders  
453 had no role in study design, data collection and analysis, decision to publish, or preparation of the  
454 paper. The authors wish to acknowledge the Eating Disorders working group of the Psychiatric  
455 Genomics Consortium for making their summary statistics publicly available.

456

#### 457 **DISCLOSURES**

458 The authors have no relevant conflicts of interest to disclose related to this study.

459

#### 460 **AUTHOR CONTRIBUTIONS**

461 W.R.R. conceived and designed the study with input from D.M.A and M.J.C. D.M.A performed the  
462 analyses. D.M.A, W.R.R. and M.J.C wrote the manuscript. W.R.R. and M.J.C contributed to the  
463 interpretation and visualisation of results.

464

#### 465 **REFERENCES:**

- 466 1. Sibeoni J, Orri M, Valentin M, Podlipski M-A, Colin S, Pradere J, et al. Metasynthesis of the  
467 Views about Treatment of Anorexia Nervosa in Adolescents: Perspectives of Adolescents, Parents,  
468 and Professionals. *PLOS ONE*. 2017;12(1):e0169493.
- 469 2. Edakubo S, Fushimi K. Mortality and risk assessment for anorexia nervosa in acute-care  
470 hospitals: a nationwide administrative database analysis. *BMC Psychiatry*. 2020;20(1):19.
- 471 3. Wonderlich SA, Bulik CM, Schmidt U, Steiger H, Hoek HW. Severe and enduring anorexia  
472 nervosa: Update and observations about the current clinical reality. *International Journal of Eating*  
473 *Disorders*. 2020;53(8):1303-12.
- 474 4. Bulik CM, Sullivan PF, Tozzi F, Furberg H, Lichtenstein P, Pedersen NL. Prevalence,  
475 Heritability, and Prospective Risk Factors for Anorexia Nervosa. *Archives of General Psychiatry*.  
476 2006;63(3):305-12.
- 477 5. Hirtz R, Hinney A. Genetic and epigenetic findings in anorexia nervosa. *Medizinische Genetik*.  
478 2020;32(1):25-9.
- 479 6. Watson HJ, Yilmaz Z, Thornton LM, Hübel C, Coleman JRI, Gaspar HA, et al. Genome-wide  
480 association study identifies eight risk loci and implicates metabo-psychiatric origins for anorexia  
481 nervosa. *Nat Genet*. 2019;51(8):1207-14.
- 482 7. Wainberg M, Sinnott-Armstrong N, Mancuso N, Barbeira AN, Knowles DA, Golan D, et al.  
483 Opportunities and challenges for transcriptome-wide association studies. *Nat Genet*.  
484 2019;51(4):592-9.
- 485 8. Reay WR, Cairns MJ. Advancing the use of genome-wide association studies for drug  
486 repurposing. *Nature Reviews Genetics*. 2021;22(10):658-71.

- 487 9. Hall LS, Medway CW, Pain O, Pardiñas AF, Rees EG, Escott-Price V, et al. A transcriptome-  
488 wide association study implicates specific pre- and post-synaptic abnormalities in schizophrenia.  
489 Hum Mol Genet. 2019;29(1):159-67.
- 490 10. Mancuso N, Freund MK, Johnson R, Shi H, Kichaev G, Gusev A, et al. Probabilistic fine-  
491 mapping of transcriptome-wide association studies. Nat Genet. 2019;51(4):675-82.
- 492 11. Cheng B, Qi X, Liang C, Zhang L, Ma M, Li P, et al. Integrative Genomic Enrichment Analysis  
493 Identified the Brain Regions and Development Stages Related to Anorexia Nervosa and Obsessive-  
494 Compulsive Disorder. Cereb Cortex. 2020;30(12):6481-9.
- 495 12. Chatzinakos C, Georgiadis F, Lee D, Cai N, Vladimirov VI, Docherty A, et al. TWAS pathway  
496 method greatly enhances the number of leads for uncovering the molecular underpinnings of  
497 psychiatric disorders. Am J Med Genet B Neuropsychiatr Genet. 2020;183(8):454-63.
- 498 13. Johnson JS, Cote AC, Dobbyn A, Sloofman LG, Xu J, Cotter L, et al. Mapping anorexia nervosa  
499 genes to clinical phenotypes. Psychol Med. 2022:1-15.
- 500 14. Gusev A, Ko A, Shi H, Bhatia G, Chung W, Penninx BW, et al. Integrative approaches for large-  
501 scale transcriptome-wide association studies. Nat Genet. 2016;48(3):245-52.
- 502 15. Gamazon ER, Wheeler HE, Shah KP, Mozaffari SV, Aquino-Michaels K, Carroll RJ, et al. A gene-  
503 based association method for mapping traits using reference transcriptome data. Nat Genet.  
504 2015;47(9):1091-8.
- 505 16. Gandal MJ, Zhang P, Hadjimichael E, Walker RL, Chen C, Liu S, et al. Transcriptome-wide  
506 isoform-level dysregulation in ASD, schizophrenia, and bipolar disorder. Science.  
507 2018;362(6420):eaat8127.
- 508 17. Wingo AP, Liu Y, Gerasimov ES, Gockley J, Logsdon BA, Duong DM, et al. Integrating human  
509 brain proteomes with genome-wide association data implicates new proteins in Alzheimer's disease  
510 pathogenesis. Nat Genet. 2021;53(2):143-6.
- 511 18. Zhang J, Dutta D, Köttgen A, Tin A, Schlosser P, Grams ME, et al. Large Bi-Ethnic Study of  
512 Plasma Proteome Leads to Comprehensive Mapping of *cis*-pQTL and Models for  
513 Proteome-wide Association Studies. bioRxiv. 2021:2021.03.15.435533.
- 514 19. Gusev A, Mancuso N, Won H, Kousi M, Finucane HK, Reshef Y, et al. Transcriptome-wide  
515 association study of schizophrenia and chromatin activity yields mechanistic disease insights. Nat  
516 Genet. 2018;50(4):538-48.
- 517 20. Reay WR, El Shair SI, Geaghan MP, Riveros C, Holliday EG, McEvoy MA, et al. Genetic  
518 association and causal inference converge on hyperglycaemia as a modifiable factor to improve lung  
519 function. Elife. 2021;10.
- 520 21. Reimand J, Kull M, Peterson H, Hansen J, Vilo J. g:Profiler--a web-based toolset for functional  
521 profiling of gene lists from large-scale experiments. Nucleic Acids Res. 2007;35(Web Server  
522 issue):W193-200.
- 523 22. Watanabe K, Taskesen E, van Bochoven A, Posthuma D. Functional mapping and annotation  
524 of genetic associations with FUMA. Nature Communications. 2017;8(1):1826.
- 525 23. Szklarczyk D, Gable AL, Lyon D, Junge A, Wyder S, Huerta-Cepas J, et al. STRING v11: protein-  
526 protein association networks with increased coverage, supporting functional discovery in genome-  
527 wide experimental datasets. Nucleic Acids Res. 2019;47(D1):D607-D13.
- 528 24. Li D, Roberts R. Human Genome and Diseases:¶WD-repeat proteins: structure  
529 characteristics, biological function, and their involvement in human diseases. Cellular and Molecular  
530 Life Sciences CMLS. 2001;58(14):2085-97.
- 531 25. Xie X, Wang Z, Chen Y. Association of LKB1 with a WD-repeat protein WDR6 is implicated in  
532 cell growth arrest and p27(Kip1) induction. Mol Cell Biochem. 2007;301(1-2):115-22.
- 533 26. Baird DA, Liu JZ, Zheng J, Sieberts SK, Perumal T, Elsworth B, et al. Identifying drug targets  
534 for neurological and psychiatric disease via genetics and the brain transcriptome. PLoS Genet.  
535 2021;17(1):e1009224.



- 536 27. Howe KL, Achuthan P, Allen J, Allen J, Alvarez-Jarreta J, Amode MR, et al. Ensembl 2021.  
537 Nucleic Acids Research. 2020;49(D1):D884-D91.
- 538 28. Kelsall IR, Duda DM, Olszewski JL, Hofmann K, Knebel A, Langevin F, et al. TRIAD1 and HHARI  
539 bind to and are activated by distinct neddylated Cullin-RING ligase complexes. *Embo j.*  
540 2013;32(21):2848-60.
- 541 29. Marteiijn JA, van Emst L, Erpelinck-Verschueren CA, Nikoloski G, Menke A, de Witte T, et al.  
542 The E3 ubiquitin-protein ligase Triad1 inhibits clonogenic growth of primary myeloid progenitor  
543 cells. *Blood.* 2005;106(13):4114-23.
- 544 30. Kawashima A, Karasawa T, Tago K, Kimura H, Kamata R, Usui-Kawanishi F, et al. ARIH2  
545 Ubiquitinates NLRP3 and Negatively Regulates NLRP3 Inflammasome Activation in Macrophages. *J*  
546 *Immunol.* 2017;199(10):3614-22.
- 547 31. Pruim RJ, Welch RP, Sanna S, Teslovich TM, Chines PS, Gliedt TP, et al. LocusZoom: regional  
548 visualization of genome-wide association scan results. *Bioinformatics.* 2010;26(18):2336-7.
- 549 32. Aguet F, Brown AA, Castel SE, Davis JR, He Y, Jo B, et al. Genetic effects on gene expression  
550 across human tissues. *Nature.* 2017;550(7675):204-13.
- 551 33. Wang Y, Yang Q, Shen S, Zhang L, Xiang Y, Weng X. Mst1 promotes mitochondrial dysfunction  
552 and apoptosis in oxidative stress-induced rheumatoid arthritis synoviocytes. *Aging (Albany NY).*  
553 2020;12(16):16211-23.
- 554 34. Zhang J, Sun L, Li W, Wang Y, Li X, Liu Y. Overexpression of macrophage stimulating 1  
555 enhances the anti-tumor effects of IL-24 in esophageal cancer via inhibiting ERK-Mfn2 signaling-  
556 dependent mitophagy. *Biomed Pharmacother.* 2019;114:108844.
- 557 35. Freshour SL, Kiwala S, Cotto KC, Coffman AC, McMichael JF, Song JJ, et al. Integration of the  
558 Drug-Gene Interaction Database (DGIdb 4.0) with open crowdsourcing efforts. *Nucleic Acids*  
559 *Research.* 2020;49(D1):D1144-D51.
- 560 36. Chai YC, Hendrich S, Thomas JA. Protein S-thiolation in hepatocytes stimulated by t-butyl  
561 hydroperoxide, menadione, and neutrophils. *Arch Biochem Biophys.* 1994;310(1):264-72.
- 562 37. Mallis RJ, Hamann MJ, Zhao W, Zhang T, Hendrich S, Thomas JA. Irreversible thiol oxidation  
563 in carbonic anhydrase III: protection by S-glutathiolation and detection in aging rats. *Biol Chem.*  
564 2002;383(3-4):649-62.
- 565 38. Li D, Burch P, Gonzalez O, Kashork CD, Shaffer LG, Bachinski LL, et al. Molecular cloning,  
566 expression analysis, and chromosome mapping of WDR6, a novel human WD-repeat gene. *Biochem*  
567 *Biophys Res Commun.* 2000;274(1):117-23.
- 568 39. Sivan G, Ormanoglu P, Buehler EC, Martin SE, Moss B. Identification of Restriction Factors by  
569 Human Genome-Wide RNA Interference Screening of Viral Host Range Mutants Exemplified by  
570 Discovery of SAMD9 and WDR6 as Inhibitors of the Vaccinia Virus K1L-C7L- Mutant. *mBio.*  
571 2015;6(4):e01122.
- 572 40. Smith TF. Diversity of WD-Repeat proteins. In: Clemen CS, Eichinger L, Rybakina V, editors.  
573 *The Coronin Family of Proteins: Subcellular Biochemistry.* New York, NY: Springer New York; 2008.  
574 p. 20-30.
- 575 41. Chiba T, Inoue D, Mizuno A, Komatsu T, Fujita S, Kubota H, et al. Identification and  
576 characterization of an insulin receptor substrate 4-interacting protein in rat brain: implications for  
577 longevity. *Neurobiol Aging.* 2009;30(3):474-82.
- 578 42. McKnight NC, Jefferies HB, Alemu EA, Saunders RE, Howell M, Johansen T, et al. Genome-  
579 wide siRNA screen reveals amino acid starvation-induced autophagy requires SCOC and WAC. *Embo*  
580 *j.* 2012;31(8):1931-46.
- 581 43. Frendo-Cumbo S, Tokarz VL, Bilan PJ, Brumell JH, Klip A. Communication Between Autophagy  
582 and Insulin Action: At the Crux of Insulin Action-Insulin Resistance? *Front Cell Dev Biol.*  
583 2021;9:708431.

584 44. Rautou PE, Cazals-Hatem D, Moreau R, Francoz C, Feldmann G, Lebrech D, et al. Acute liver  
585 cell damage in patients with anorexia nervosa: a possible role of starvation-induced hepatocyte  
586 autophagy. *Gastroenterology*. 2008;135(3):840-8, 8.e1-3.

587 45. van Niekerk G, Loos B, Nell T, Engelbrecht AM. Autophagy--A free meal in sickness-associated  
588 anorexia. *Autophagy*. 2016;12(4):727-34.

589 46. Adams DM, Reay WR, Geaghan MP, Cairns MJ. Investigation of glycaemic traits in psychiatric  
590 disorders using Mendelian randomisation revealed a causal relationship with anorexia nervosa.  
591 *Neuropsychopharmacology*. 2021;46(6):1093-102.

592 47. Reay WR, Kiltchewskij DJ, Geaghan MP, Atkins JR, Carr VJ, Green MJ, et al. Genetic estimates  
593 of correlation and causality between blood-based biomarkers and psychiatric disorders. *Sci Adv*.  
594 2022;8(14):eabj8969.

595 48. Dalton B, Bartholdy S, Robinson L, Solmi M, Ibrahim MAA, Breen G, et al. A meta-analysis of  
596 cytokine concentrations in eating disorders. *J Psychiatr Res*. 2018;103:252-64.

597 49. Gibson D, Mehler PS. Anorexia Nervosa and the Immune System-A Narrative Review. *J Clin*  
598 *Med*. 2019;8(11).

599 50. Chanda D, Li J, Oligschlaeger Y, Jeurissen ML, Houben T, Walenbergh SM, et al. MSP is a  
600 negative regulator of inflammation and lipogenesis in ex vivo models of non-alcoholic  
601 steatohepatitis. *Exp Mol Med*. 2016;48(9):e258.

602 51. Lu K, Zhao J, Liu W. Macrophage stimulating 1-induced inflammation response promotes  
603 aortic aneurysm formation through triggering endothelial cells death and activating the NF- $\kappa$ B  
604 signaling pathway. *J Recept Signal Transduct Res*. 2020;40(4):374-82.

605 52. Kong D, Shen Y, Liu G, Zuo S, Ji Y, Lu A, et al. PKA regulatory II $\alpha$  subunit is essential for PGD<sub>2</sub>-  
606 mediated resolution of inflammation. *J Exp Med*. 2016;213(10):2209-26.

607 53. Dalton B, Campbell IC, Chung R, Breen G, Schmidt U, Himmerich H. Inflammatory Markers in  
608 Anorexia Nervosa: An Exploratory Study. *Nutrients*. 2018;10(11).

609 54. Caso JR, Graell M, Navalón A, MacDowell KS, Gutiérrez S, Soto M, et al. Dysfunction of  
610 inflammatory pathways in adolescent female patients with anorexia nervosa. *Progress in Neuro-*  
611 *Psychopharmacology and Biological Psychiatry*. 2020;96:109727.

612 55. Del Giudice M, Gangestad SW. Rethinking IL-6 and CRP: Why they are more than  
613 inflammatory biomarkers, and why it matters. *Brain Behav Immun*. 2018;70:61-75.

614
